# Supplementary material for: Binuclear manganese and rhenium carbonyls M2(CO)n (n = 10, 9, 8, 7): comparison of first row and third row transition metal carbonyl structures
Source: Royal Society of Chemistry journal article supplement (doi:10.1039/b715211f), 2008-01-01
Supplement: b715211f.pdf [file b715211f.pdf]

# Binuclear Manganese and Rhenium Carbonyls $M_2(CO)_n$ ( $n = 10, 9, 8, 7$ ): Comparison of First Row and Third Row Transition Metal Carbonyl Structures

Bing Xu,<sup>a</sup> Qian-Shu Li,<sup>\*a,b</sup> Yaoming Xie,<sup>c</sup> R. Bruce King,<sup>\*c</sup> and Henry F. Schaefer  
III<sup>c</sup>

<sup>a</sup>*Institute of Chemical Physics, Beijing Institute of Technology, Beijing 100081, China*

<sup>b</sup>*Center for Computational Quantum Chemistry, South China Normal University,  
Guangzhou, 510631 China*

<sup>c</sup>*Department of Chemistry and Center for Computational Chemistry*

*University of Georgia, Athens, Georgia 30602, USA*

e-mails: [rbking@chem.uga.edu](mailto:rbking@chem.uga.edu) and [qsli@scnu.edu.cn](mailto:qsli@scnu.edu.cn)

## Supporting Information

**Figures S1 to S7 and Tables S1 to S13:** Optimized structures, total energies, relative energies, imaginary vibrational frequencies, and  $\nu(\text{CO})$  frequencies for  $\text{Re}_2(\text{CO})_{10}$  (3 isomers),  $\text{Re}_2(\text{CO})_9$  (8 isomers),  $\text{Re}_2(\text{CO})_8$  (17 isomers) and  $\text{Re}_2(\text{CO})_7$  (10 isomers)

**Complete Gaussian 03 reference (Reference 30)**

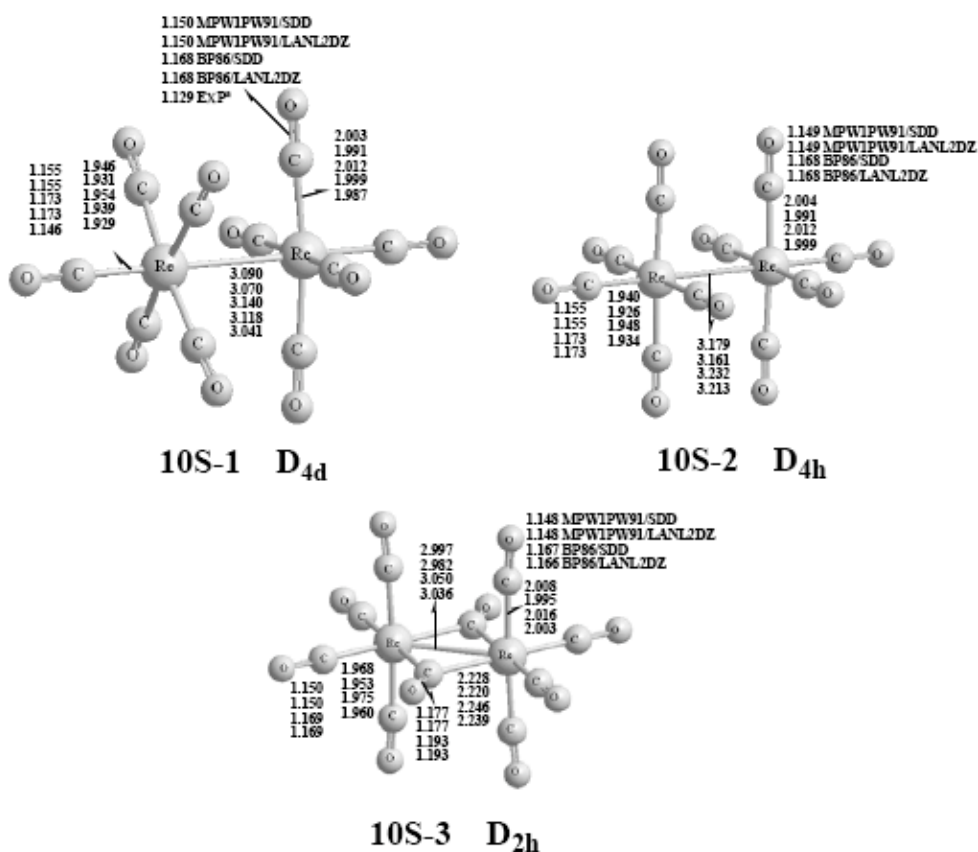

**Figure S1.** The optimized structures of  $\text{Re}_2(\text{CO})_{10}$ .

**Table S1.** The total energies ( $E$ , in Hartree) and relative energies ( $\Delta E$ , in kcal/mol) of  $\text{Re}_2(\text{CO})_{10}$ . The number of imaginary vibrational frequencies ( $N_{\text{imag}}$ ) and the Re-Re bond distance for each structure are also listed.

|                      |                   | 10S-1 (D <sub>4d</sub> ) | 10S-2 (D <sub>4h</sub> ) | 10S-3 (D <sub>2h</sub> ) |
|----------------------|-------------------|--------------------------|--------------------------|--------------------------|
| MPW1PW91/<br>SDD     | E                 | -1290.21336              | -1290.20633              | -1290.16672              |
|                      | $\Delta E$        | 0                        | 4.4                      | 29.3                     |
|                      | $N_{\text{imag}}$ | 0                        | 1(18i)                   | 1(150i)                  |
|                      | Re-Re             | 3.090                    | 3.179                    | 2.997                    |
| BP86/<br>SDD         | E                 | -1290.76883              | -1290.76301              | -1290.72988              |
|                      | $\Delta E$        | 0                        | 3.7                      | 24.4                     |
|                      | $N_{\text{imag}}$ | 0                        | 1(14i)                   | 1(134i)                  |
|                      | Re-Re             | 3.140                    | 3.232                    | 3.050                    |
| MPW1PW91/<br>LANL2DZ | E                 | -1291.77740              | -1291.77025              | -1291.72953              |
|                      | $\Delta E$        | 0                        | 4.5                      | 30                       |
|                      | $N_{\text{imag}}$ | 0                        | 1(20i)                   | 1(158i)                  |
|                      | Re-Re             | 3.070                    | 3.161                    | 2.982                    |
| BP86/<br>LANL2DZ     | E                 | -1292.27936              | -1292.27328              | -1292.23903              |
|                      | $\Delta E$        | 0                        | 3.8                      | 25.3                     |
|                      | $N_{\text{imag}}$ | 0                        | 1(16i)                   | 1(144i)                  |
|                      | Re-Re             | 3.118                    | 3.213                    | 3.036                    |

**Table S2.** The active infrared  $\nu(\text{CO})$  vibrational frequencies ( $\text{cm}^{-1}$ ) predicted for  $\text{Re}_2(\text{CO})_{10}$  (infrared intensities in parentheses are in  $\text{km/mol}$ , bridging  $\nu(\text{CO})$  frequencies are in **bold**).

|                           | MPW1PW91/<br>SDD                                                               | MPW1PW91/<br>LANL2DZ                                                           | BP86/<br>SDD                                                                 | BP86/<br>LANL2DZ                                                             |
|---------------------------|--------------------------------------------------------------------------------|--------------------------------------------------------------------------------|------------------------------------------------------------------------------|------------------------------------------------------------------------------|
| <b>10S-1</b> ( $D_{4d}$ ) | 2089(1630),<br>2124(2950),<br>2172(1078)                                       | 2095(1575),<br>2127(2925),<br>2176(1092)                                       | 1974(1368),<br>2002(2484),<br>2052(934)                                      | 1981(1305),<br>2006(2458),<br>2056(955)                                      |
| <b>10S-2</b> ( $D_{4h}$ ) | 2089(1475),<br>2128(2902),<br>2173(1327)                                       | 2095(1412),<br>2131(2873),<br>2177(1351)                                       | 1975(1241),<br>2006(2434),<br>2053(1128)                                     | 1982(1170),<br>2009(2403),<br>2057(1158)                                     |
| <b>10S-3</b> ( $D_{2h}$ ) | <b>1883(1099)</b> ,<br>2123(1067),<br>2123(2046),<br>2130(3008),<br>2175(1736) | <b>1889(1115)</b> ,<br>2127(1044),<br>2129(2007),<br>2134(2965),<br>2179(1735) | <b>1800(839)</b> ,<br>1999(762),<br>2001(1721),<br>2005(2533),<br>2048(1721) | <b>1805(854)</b> ,<br>2004(734),<br>2007(1683),<br>2009(2492),<br>2053(1716) |

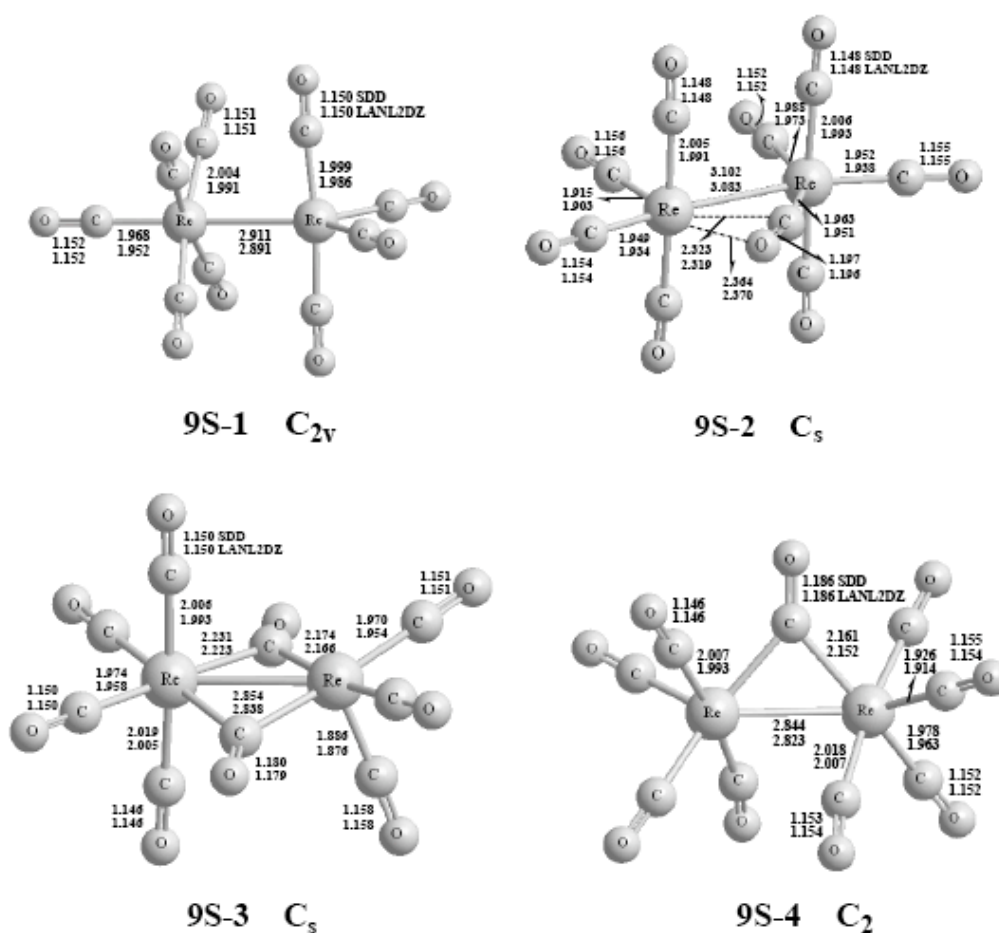

**Figure S2.** The optimized singlet structures of  $\text{Re}_2(\text{CO})_9$  by MPW1PW91 method.

**Table S3.** The total energies (E, in Hartree) and relative energies ( $\Delta E$ , in kcal/mol) of singlet structures of  $\text{Re}_2(\text{CO})_9$ . The number of imaginary vibrational frequencies (Nimag) and the Re-Re bond distance for each structure are also listed.

|                      |            | 9S-1 ( $C_{2v}$ ) | 9S-2 ( $C_s$ ) | 9S-3 ( $C_s$ ) | 9S-4 ( $C_2$ ) |
|----------------------|------------|-------------------|----------------|----------------|----------------|
| MPW1PW91/<br>SDD     | E          | -1176.84455       | -1176.84420    | -1176.80326    | -1176.79807    |
|                      | $\Delta E$ | 0                 | 0.2            | 25.9           | 29.2           |
|                      | Nimag      | 0                 | 0              | 1(117i)        | 1(100i)        |
|                      | Re-Re      | 2.911             | 3.102          | 2.854          | 2.844          |
| MPW1PW91/<br>LANL2DZ | E          | -1178.40789       | -1178.40675    | -1178.36509    | -1178.35932    |
|                      | $\Delta E$ | 0                 | 0.7            | 26.9           | 30.5           |
|                      | Nimag      | 0                 | 0              | 1(125i)        | 2(115i,9i)     |
|                      | Re-Re      | 2.891             | 3.083          | 2.838          | 2.823          |
| BP86/SDD             | E          | -1177.36824       | -1177.36957    | -1177.33418    | -1177.33060    |
|                      | $\Delta E$ | 0                 | 0.8            | 21.4           | 23.6           |
|                      | Nimag      | 0                 | 0              | 1(136i)        | 2(89i,12i)     |
|                      | Re-Re      | 2.939             | 3.144          | 2.881          | 2.882          |

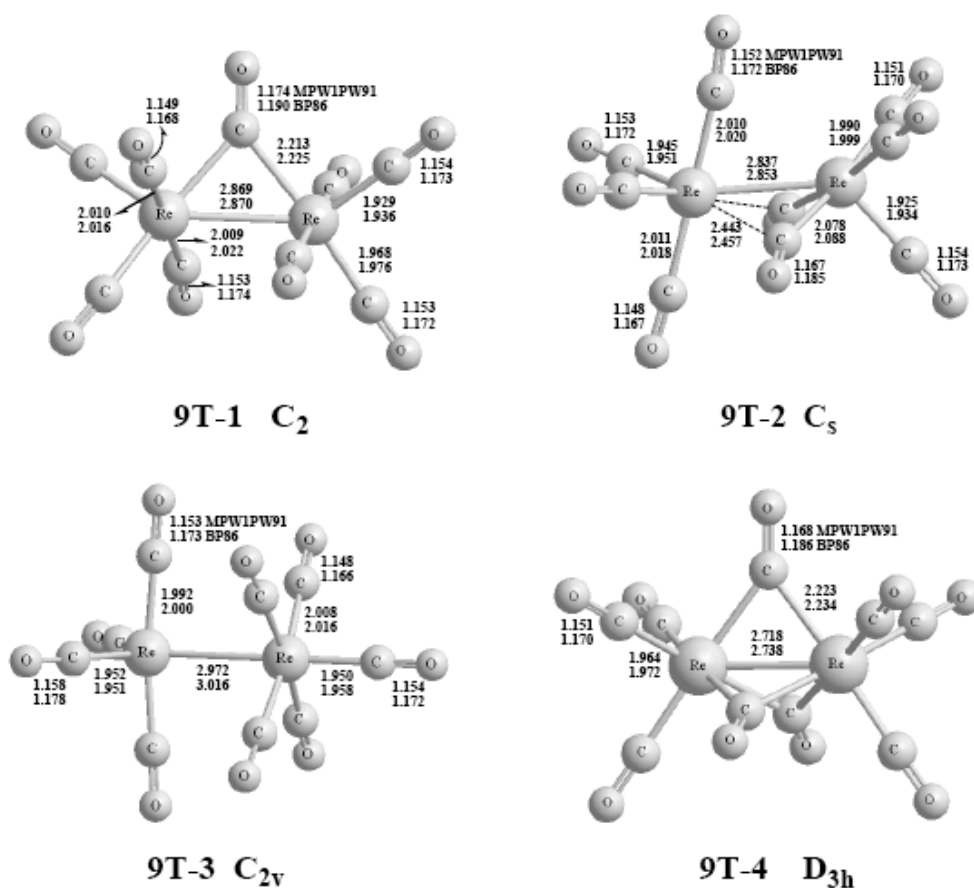

**Figure S3.** The four optimized triplet structures of  $\text{Re}_2(\text{CO})_9$  by SDD basis sets.

**Table S4.** The total energies (E, in Hartree) and relative energies ( $\Delta E$ , in kcal/mol) of triplet structures of  $\text{Re}_2(\text{CO})_9$ . The number of imaginary vibrational frequencies (Nimag) and the Re-Re bond distance for each structure is also listed.

|                  |            | <b>9T-1</b> ( $C_2$ ) | <b>9T-2</b> ( $C_s$ ) | <b>9T-3</b> ( $C_{2v}$ ) | <b>9T-4</b> ( $D_{3h}$ ) |
|------------------|------------|-----------------------|-----------------------|--------------------------|--------------------------|
| MPW1PW91/<br>SDD | E          | -1176.80134           | -1176.79893           | -1176.79892              | -1176.79307              |
|                  | $\Delta E$ | 27.1                  | 28.6                  | 28.6                     | 32.3                     |
|                  | Nimag      | 0                     | 1(99i)                | 0                        | 2(92i,92i)               |
|                  | Re-Re      | 2.869                 | 2.837                 | 2.972                    | 2.718                    |
| BP86/SDD         | E          | -1177.32944           | -1177.32839           | -1177.32610              | -1177.32308              |
|                  | $\Delta E$ | 24.3                  | 25.0                  | 26.4                     | 28.3                     |
|                  | Nimag      | 0                     | 1(59i)                | 0                        | 2(116i,116i)             |
|                  | Re-Re      | 2.870                 | 2.853                 | 3.016                    | 2.738                    |

**Table S5.** The infrared  $\nu(\text{CO})$  vibrational frequencies ( $\text{cm}^{-1}$ ) predicted for  $\text{Re}_2(\text{CO})_9$  (infrared intensities in parentheses are in  $\text{km/mol}$ , bridging  $\nu(\text{CO})$  frequencies are in **bold**).

|                             | MPW1PW91/SDD                                                                                                                      | BP86/SDD                                                                                                                         | MPW1PW91/LANL2DZ                                                                                                                  |
|-----------------------------|-----------------------------------------------------------------------------------------------------------------------------------|----------------------------------------------------------------------------------------------------------------------------------|-----------------------------------------------------------------------------------------------------------------------------------|
| <b>9S-1</b><br>( $C_{2v}$ ) | 2069(551), 2080(22),<br>2093(1004), 2105(2186),<br>2108(305), 2119(2963),<br>2126(0), 2163(1099),<br>2215(22)                     | 1954(437), 1960(87),<br>1974(728), 1987(1847),<br>1988(334), 1997(2393),<br>2006(0), 2039(962),<br>2087(37)                      | 2074(517), 2083(30),<br>2098(973), 2109(2194),<br>2113(298), 2122(2928),<br>2130(0), 2167(1109),<br>2219(21)                      |
| <b>9S-2</b><br>( $C_s$ )    | <b>1836(548)</b> , 2079(520),<br>2094(39), 2095(1365),<br>2106(785), 2124(541),<br>2128(3008), 2175(1007),<br>2217(52)            | <b>1728(458)</b> , 1966(485),<br>1972(84), 1979(1015),<br>1985(596), 2002(519),<br>2004(2480), 2051(923),<br>2088(45)            | <b>1844(544)</b> , 2086(508),<br>2097(30), 2101(1320),<br>2111(772), 2129(529),<br>2131(2980), 2179(1022),<br>2221(54)            |
| <b>9S-3</b><br>( $C_s$ )    | <b>1869(1005)</b> , <b>1920(30)</b> ,<br>2077(499), 2113(1650),<br>2114(393), 2127(1615),<br>2137(1287), 2155(1876),<br>2210(134) | <b>1789(771)</b> , <b>1820(48)</b> ,<br>1965(381), 1986(433),<br>1988(1404), 2002(1245),<br>2010(972), 2028(1780),<br>2078(151)  | <b>1874(1020)</b> , <b>1924(29)</b> ,<br>2084(460), 2117(1693),<br>2119(433), 2132(1531),<br>2141(1225), 2159(1875),<br>2214(131) |
| <b>9S-4</b><br>( $C_2$ )    | <b>1862(561)</b> , 2072(42),<br>2083(46), 2095(902),<br>2101(2327), 2122(1194),<br>2131(1530), 2168(1973),<br>2210(10)            | <b>1778(433)</b> , 1953(65),<br>1962(70), 1976(692),<br>1980(1869), 1995(911),<br>2001(1296), 2039(1827),<br>2078(6)             | <b>1867(569)</b> , 2076(65),<br>2087(110), 2101(904),<br>2105(2229), 2126(1201),<br>2134(1439), 2170(2005),<br>2214(9)            |
| <b>9T-1</b><br>( $C_2$ )    | <b>1945(401)</b> , 2074(40),<br>2084(304), 2093(903),<br>2095(2146), 2112(170),<br>2112(2190), 2150(2263),<br>2201(5)             | <b>1838(360)</b> , 1946(150),<br>1953(658), 1974(269),<br>1978(1669), 1987(109),<br>1988(1664), 2022(2245),<br>2068(2)           |                                                                                                                                   |
| <b>9T-2</b><br>( $C_s$ )    | <b>1981(741)</b> , <b>1983(187)</b> ,<br>2086(143), 2094(796),<br>2101(1618), 2106(1261),<br>2116(1223), 2146(2557),<br>2199(19)  | <b>1869(633)</b> , <b>1872(152)</b> ,<br>1961(342), 1976(562),<br>1982(1041), 1985(1095),<br>1990(985), 2022(2338),<br>2067(9)   |                                                                                                                                   |
| <b>9T-3</b><br>( $C_{2v}$ ) | 2053(1261), 2057(852),<br>2063(618), 2099(599),<br>2119(1864), 2124(2394),<br>2137(964), 2143(0),<br>2219(159)                    | 1935(690), 1936(890),<br>1943(545), 1982(575),<br>1997(1543), 2000(1919),<br>2013(747), 2019(0),<br>2090(155)                    |                                                                                                                                   |
| <b>9T-4</b><br>( $D_{3h}$ ) | <b>1958(758)</b> , <b>1958(758)</b> ,<br><b>2006(0)</b> , 2105(0),<br>2105(0), 2112(1974),<br>2112(1974), 2150(2770),<br>2193(0)  | <b>1852(629)</b> , <b>1852(629)</b> ,<br><b>1882(0)</b> , 1983(0),<br>1983(0), 1990(1610),<br>1990(1610), 2024(2482),<br>2063(0) | <b>1962(763)</b> , <b>1962(763)</b> ,<br><b>2009(0)</b> , 2111(0),<br>2111(0), 2118(1940),<br>2118(1940), 2155(2728),<br>2198(0)  |

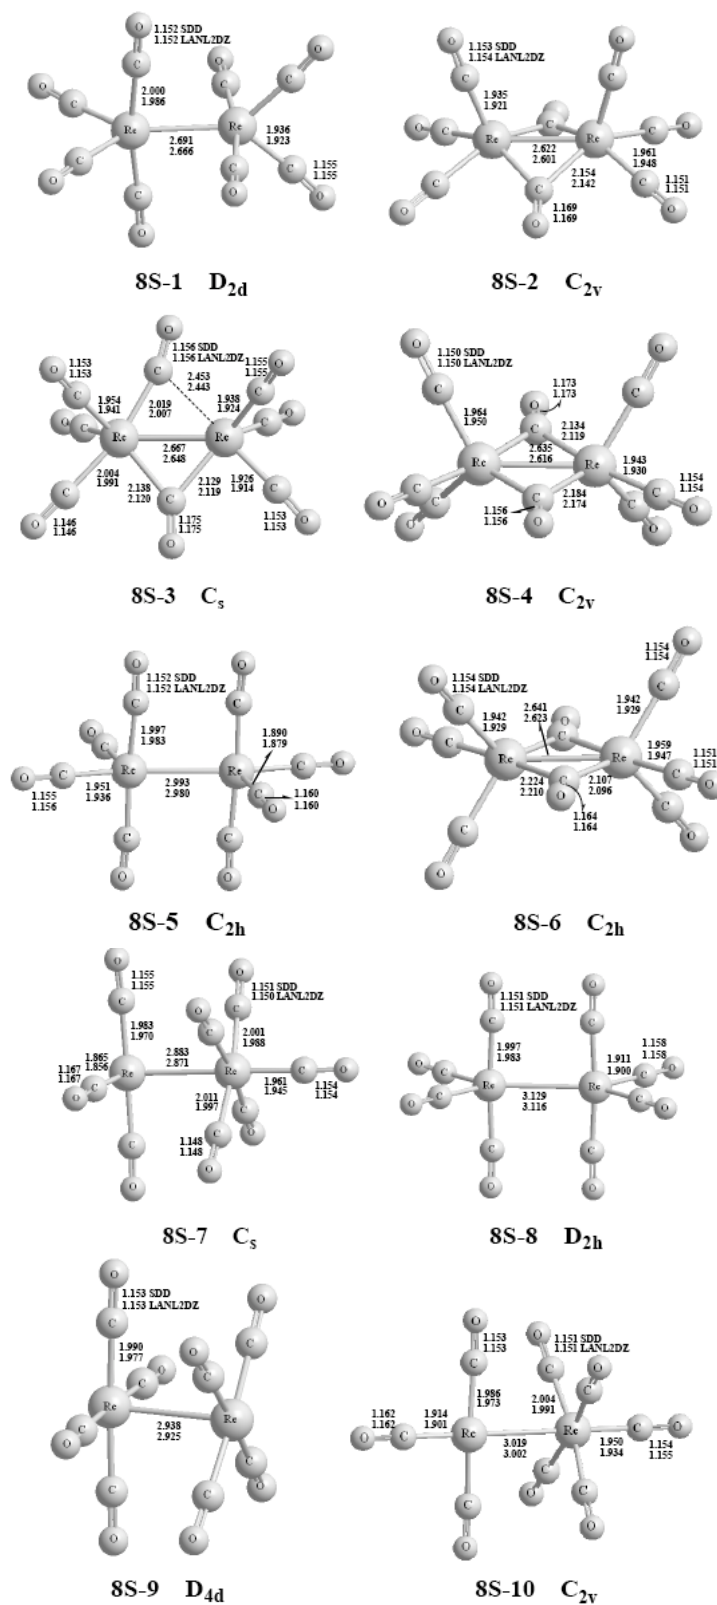

**Figure S4.** The optimized ten singlet structures of  $\text{Re}_2(\text{CO})_8$  by the MPW1PW91 method.

**Table S6.** The total energies (E, in Hartree) and relative energies ( $\Delta E$ , in kcal/mol) of singlet structures of  $\text{Re}_2(\text{CO})_8$ . The number of imaginary vibrational frequencies (Nimag) and the Re-Re bond distance for each structure are also listed.

|                  | <b>8S-1</b> ( $D_{2d}$ ) | <b>8S-2</b> ( $C_{2v}$ ) | <b>8S-3</b> ( $C_s$ ) | <b>8S-4</b> ( $C_{2v}$ ) | <b>8S-5</b> ( $C_{2h}$ ) |
|------------------|--------------------------|--------------------------|-----------------------|--------------------------|--------------------------|
| MPW1PW91/SDD     |                          |                          |                       |                          |                          |
| E                | -1063.48100              | -1063.46028              | -1063.45735           | -1063.45483              | -1063.45249              |
| $\Delta E$       | 0                        | 13                       | 14.8                  | 16.4                     | 17.9                     |
| Nimag            | 0                        | 0                        | 1(20i)                | 2(232i,38i)              | 1(37i)                   |
| Re-Re            | 2.691                    | 2.622                    | 2.667                 | 2.635                    | 2.993                    |
| MPW1PW91/LANL2DZ |                          |                          |                       |                          |                          |
| E                | -1065.04430              | -1065.02017              | -1065.01787           | -1065.01514              | -1065.01425              |
| $\Delta E$       | 0                        | 15.1                     | 16.6                  | 18.3                     | 18.9                     |
| Nimag            | 0                        | 0                        | 1(17i)                | 2(231i,36i)              | 1(38i)                   |
| Re-Re            | 2.666                    | 2.601                    | 2.648                 | 2.616                    | 2.980                    |
| BP86/SDD         |                          |                          |                       |                          |                          |
| E                | -1063.97512              | -1063.96332              | -1063.95909           | -1063.95776              | -1063.94449              |
| $\Delta E$       | 0                        | 7.4                      | 10.1                  | 10.9                     | 19.2                     |
| Nimag            | 0                        | 0                        | 1(19i)                | 2(180i,36i)              | 2(37i,5i)                |
| Re-Re            | 2.699                    | 2.660                    | 2.702                 | 2.680                    | 3.010                    |

**Table S7.** The total energies (E, in Hartree) and relative energies ( $\Delta E$ , in kcal/mol) of singlet  $\text{Re}_2(\text{CO})_8$  structures. The number of imaginary vibrational frequencies (Nimag) and the Re-Re bond distance for each structure are also listed.

|                  | <b>8S-6</b> ( $C_{2h}$ ) | <b>8S-7</b> ( $C_s$ ) | <b>8S-8</b> ( $D_{2h}$ ) | <b>8S-9</b> ( $D_{4d}$ ) | <b>8S-10</b> ( $C_{2v}$ ) |
|------------------|--------------------------|-----------------------|--------------------------|--------------------------|---------------------------|
| MPW1PW91/SDD     |                          |                       |                          |                          |                           |
| E                | -1063.45026              | -1063.44485           | -1063.44438              | -1063.4149               | -1063.40935               |
| $\Delta E$       | 19.3                     | 22.7                  | 23.0                     | 41.5                     | 45.0                      |
| Nimag            | 3(72i,19i,16i)           | 0                     | 3(56i,40i,18i)           | 0                        | 1(120i)                   |
| Re-Re            | 2.641                    | 2.883                 | 3.129                    | 2.938                    | 3.019                     |
| MPW1PW91/LANL2DZ |                          |                       |                          |                          |                           |
| E                | -1065.01047              | -1065.00639           | -1065.00580              | -1064.97495              | -1064.97071               |
| $\Delta E$       | 21.2                     | 23.8                  | 24.2                     | 43.5                     | 46.2                      |
| Nimag            | 3(71i,43i,18i)           | 0                     | 3(56i,41i,16i)           | 0                        | 1(119i)                   |
| Re-Re            | 2.623                    | 2.871                 | 3.116                    | 2.925                    | 3.002                     |
| BP86/SDD         |                          |                       |                          |                          |                           |
| E                | -1063.95435              | -1063.93836           | -1063.93801              |                          |                           |
| $\Delta E$       | 13                       | 23.1                  | 23.3                     |                          |                           |
| Nimag            | 1(58i)                   | 0                     | 3(51i,40i,14i)           |                          |                           |
| Re-Re            | 2.691                    | 2.888                 | 3.161                    |                          |                           |



**Table S8.** The infrared  $\nu(\text{CO})$  vibrational frequencies ( $\text{cm}^{-1}$ ) predicted for singlet structures of  $\text{Re}_2(\text{CO})_8$  (infrared intensities in parentheses are in  $\text{km/mol}$ , bridging  $\nu(\text{CO})$  frequencies are in **bold**).

|                                     | MPW1PW91/SDD                                                                                              | MPW1PW91/LANL2DZ                                                                                          | BP86/SDD                                                                                                 |
|-------------------------------------|-----------------------------------------------------------------------------------------------------------|-----------------------------------------------------------------------------------------------------------|----------------------------------------------------------------------------------------------------------|
| <b>8S-1</b><br>( $\text{D}_{2d}$ )  | 2072(76), 2072(76),<br>2096(2717), 2096(2717),<br>2100(762), 2100(0),<br>2145(1484), 2192(0)              | 2077(35), 2077(35),<br>2100(2728), 2100(2728),<br>2105(721), 2106(0),<br>2150(1514), 2197(0)              | 1954(18), 1954(18),<br>1975(2281), 1975(2281),<br>1979(522), 1980(0),<br>2021(1349), 2061(0)             |
| <b>8S-2</b><br>( $\text{C}_{2v}$ )  | <b>1962(88), 1970(847),</b><br>2089(57), 2106(2136),<br>2109(0), 2115(1763),<br>2153(2702), 2190(11)      | <b>1966(87), 1974(851),</b><br>2095(68), 2112(2068),<br>2114(0), 2119(1733),<br>2158(2664), 2195(15)      | <b>1835(66), 1841(640),</b><br>1967(2), 1983(1774),<br>1988(0), 1993(1423),<br>2030(2268), 2060(2)       |
| <b>8S-3</b><br>( $\text{C}_s$ )     | <b>1921(494),</b> 2064(376),<br>2077(509), 2095(1014),<br>2097(2022), 2127(970),<br>2153(2100), 2197(235) | <b>1924(488),</b> 2068(390),<br>2083(516), 2100(1011),<br>2102(1973), 2132(919),<br>2157(2096), 2201(225) | <b>1793(358),</b> 1929(345),<br>1957(437), 1975(697),<br>1978(1671), 2000(783),<br>2029(1819), 2065(203) |
| <b>8S-4</b><br>( $\text{C}_{2v}$ )  | <b>1930(476), 2057(577),</b><br>2079(0), 2093(2460),<br>2108(31), 2113(1649),<br>2153(2571), 2190(1)      | <b>1931(468), 2060(602),</b><br>2086(0), 2099(2419),<br>2113(24), 2118(1603),<br>2157(2546), 2194(1)      | <b>1794(354), 1911(456),</b><br>1961(0), 1975(2057),<br>1984(36), 1989(1303),<br>2029(2177), 2059(1)     |
| <b>8S-5</b><br>( $\text{C}_{2h}$ )  | 2062(0), 2066(0),<br>2068(2196), 2080(982),<br>2099(0), 2110(2994),<br>2145(1602), 2197(0)                | 2068(0), 2069(0)<br>2073(2182), 2085(926),<br>2104(0), 2114(2956),<br>2149(1619), 2201(0)                 | 1945(0), 1950(0),<br>1955(1773), 1961(829),<br>1977(0), 1984(2443),<br>2022(1410), 2067(0)               |
| <b>8S-6</b><br>( $\text{C}_{2h}$ )  | <b>1985(0), 1996(1152),</b><br>2088(0), 2092(2581),<br>2109(0), 2112(1632),<br>2152(2559), 2187(0)        | <b>1988(0), 1998(1148),</b><br>2094(0), 2098(2531),<br>2114(0), 2117(1606),<br>2156(2529), 2191(0)        | <b>1842(0), 1857(878),</b><br>1967(0), 1971(2184),<br>1987(0), 1988(1263),<br>2030(2151), 2058(0)        |
| <b>8S-7</b><br>( $\text{C}_s$ )     | 2028(738), 2041(1008),<br>2094(1008), 2112(2091),<br>2113(1767), 2138(478),<br>2142(288), 2215(145)       | 2033(733), 2044(1009),<br>2100(994), 2115(2078),<br>2116(1731), 2141(481),<br>2146(266), 2219(145)        | 1918(953), 1919(517),<br>1977(911), 1992(1642),<br>1994(1522), 2010(414),<br>2020(180), 2088(134)        |
| <b>8S-8</b><br>( $\text{D}_{2h}$ )  | 2066(0), 2070(2390),<br>2071(0), 2091(731),<br>2100(0), 2114(3021),<br>2154(1330), 2198(0)                | 2071(0), 2073(0),<br>2075(2366), 2086(673),<br>2106(0), 2117(2979),<br>2157(1367), 2202(0)                | 1948(0), 1952(0),<br>1954(1957), 1962(533),<br>1981(0), 1987(2463),<br>2031(1133), 2068(0)               |
| <b>8S-9</b><br>( $\text{D}_{4d}$ )  | 2040(0), 2040(0),<br>2088(3740), 2088(3740),<br>2119(0), 2119(0),<br>2161(277), 2208(0)                   | 2042(0), 2042(0),<br>2090(3701), 2090(3701),<br>2122(0), 2122(0),<br>2164(270), 2212(0)                   |                                                                                                          |
| <b>8S-10</b><br>( $\text{C}_{2v}$ ) | 2050(1459), 2062(419),<br>2093(480), 2102(1714),<br>2110(2820), 2125(0),<br>2140(1066), 2207(117)         | 2055(1436), 2065(428),<br>2099(455), 2105(1703),<br>2114(2776), 2129(0),<br>2144(1059), 2212(123)         |                                                                                                          |

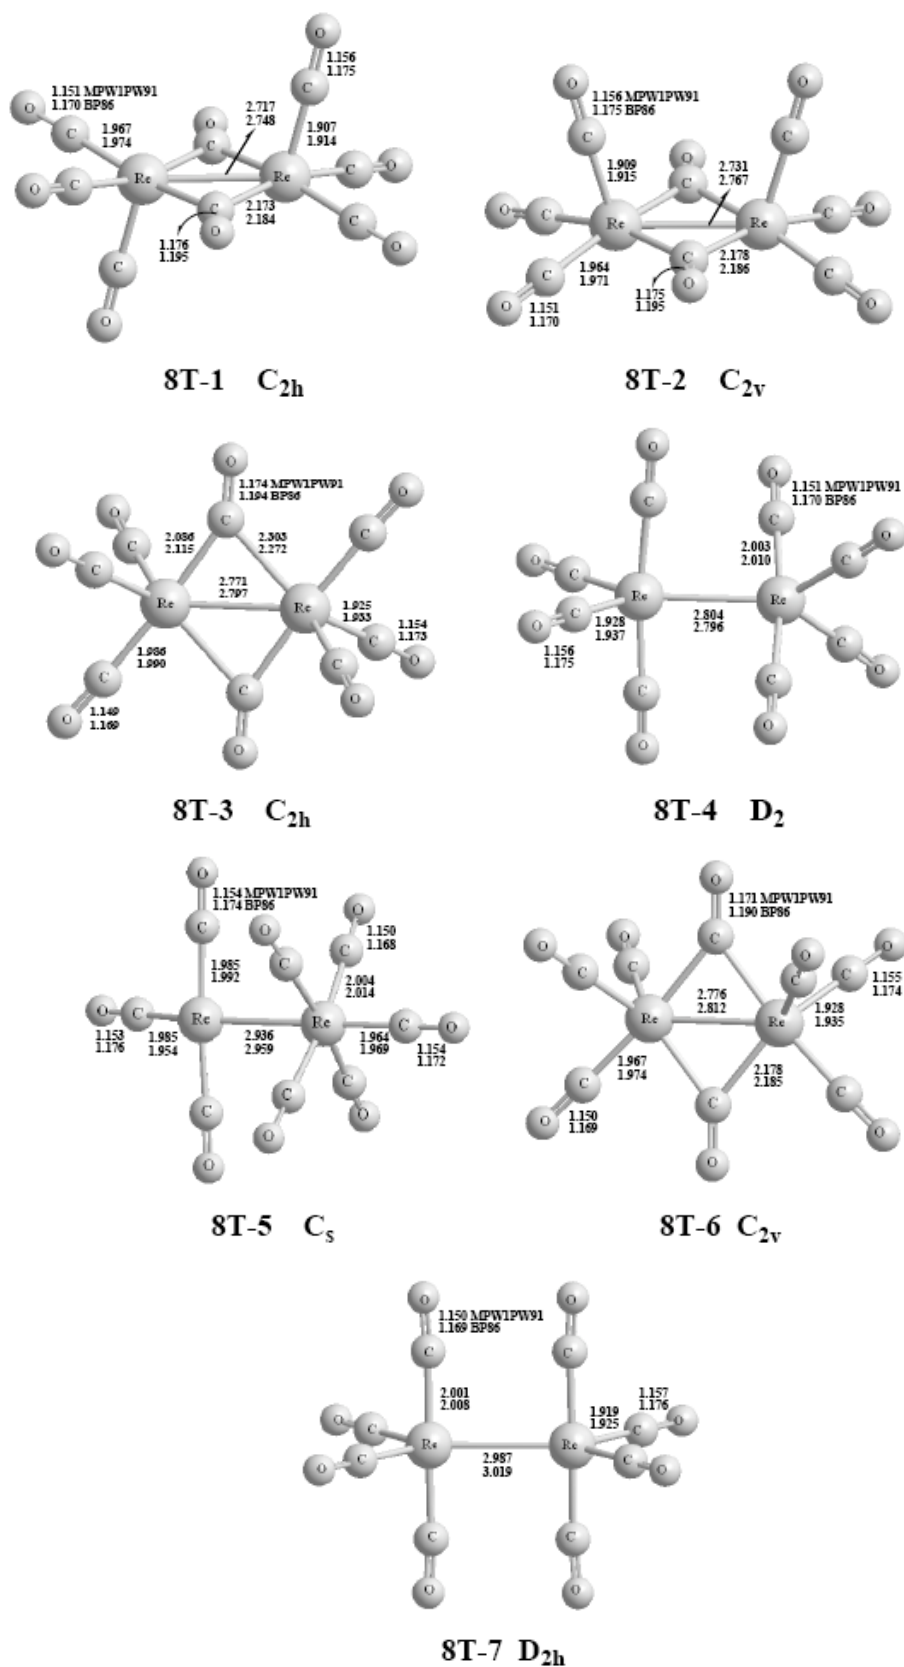

**Figure S5.** The optimized triplet structures of  $Re_2(CO)_8$  by SDD basis sets.

**Table S9.** The total energies (E, in Hartree) and relative energies ( $\Delta E$ , in kcal/mol) of triplet structures of  $\text{Re}_2(\text{CO})_8$ . The number of imaginary vibrational frequencies (Nimag) and the Re-Re bond distance for each structure are also listed.

|              | <b>8T-1</b> ( $C_{2h}$ ) | <b>8T-2</b> ( $C_{2v}$ ) | <b>8T-3</b> ( $C_{2h}$ ) | <b>8T-4</b> ( $D_2$ ) | <b>8T-5</b> ( $C_s$ ) | <b>8T-6</b> ( $C_{2v}$ ) | <b>8T-7</b> ( $D_{2h}$ ) |
|--------------|--------------------------|--------------------------|--------------------------|-----------------------|-----------------------|--------------------------|--------------------------|
| MPW1PW91/SDD |                          |                          |                          |                       |                       |                          |                          |
| E            | -1063.44880              | -1063.44732              | -1063.44097              | -1063.44043           | -1063.42874           | -1063.43859              | -1063.43420              |
| $\Delta E$   | 20.2                     | 21.1                     | 25.1                     | 25.5                  | 32.8                  | 26.6                     | 29.4                     |
| Nimag        | 0                        | 0                        | 2(60i,27i)               | 1(23i)                | 0                     | 2(92i,51i)               | 2(44i,30i)               |
| Re-Re        | 2.717                    | 2.731                    | 2.771                    | 2.804                 | 2.936                 | 2.776                    | 2.987                    |
| BP86/SDD     |                          |                          |                          |                       |                       |                          |                          |
| E            | -1063.94628              | -1063.94457              | -1063.93975              | -1063.93750           | -1063.91472           | -1063.93738              | -1063.92856              |
| $\Delta E$   | 18.1                     | 19.2                     | 22.2                     | 23.6                  | 37.9                  | 23.7                     | 29.2                     |
| Nimag        | 0                        | 0                        | 2(58i,23i)               | 1(9i)                 | 0                     | 2(97i,49i)               | 2(43i,32i)               |
| Re-Re        | 2.748                    | 2.767                    | 2.797                    | 2.796                 | 2.959                 | 2.812                    | 3.019                    |

**Table S10.** The infrared  $\nu(\text{CO})$  vibrational frequencies ( $\text{cm}^{-1}$ ) predicted for triplet structures of  $\text{Re}_2(\text{CO})_8$  (infrared intensities in parentheses are in  $\text{km/mol}$ , bridging  $\nu(\text{CO})$  frequencies are in **bold**).

|                             | MPW1PW91/SDD                                                                                      | BP86/SDD                                                                                          |
|-----------------------------|---------------------------------------------------------------------------------------------------|---------------------------------------------------------------------------------------------------|
| <b>8T-1</b><br>( $C_{2h}$ ) | <b>1892(685), 1930(0)</b> , 2087(0),<br>2093(2110), 2111(0), 2116(1867),<br>2145(3036), 2185(0)   | <b>1786(550), 1809(0)</b> , 1969(0),<br>1974(1792), 1985(0), 1991(1514),<br>2020(2548), 2055(0)   |
| <b>8T-2</b><br>( $C_{2v}$ ) | <b>1893(692), 1937(2)</b> , 2083(46),<br>2098(1987), 2111(0), 2117(1871),<br>2147(2973), 2187(15) | <b>1782(555), 1809(0)</b> , 1964(40),<br>1978(1660), 1987(0), 1992(1504),<br>2021(2524), 2056(11) |
| <b>8T-3</b><br>( $C_{2h}$ ) | <b>1911(742), 1943(0)</b> , 2087(0),<br>2092(2323), 2110(0), 2113(1784),<br>2146(2891), 2184(0)   | <b>1790(571), 1813(0)</b> , 1969(0),<br>1974(1931), 1985(0), 1988(1453),<br>2022(2366), 2053(0)   |
| <b>8T-4</b><br>( $D_2$ )    | 2070(547), 2070(157), 2084(1016),<br>2085(2023), 2097(0), 2106(2816),<br>2136(2172), 2193(0)      | 1947(193), 1950(113), 1962(1951),<br>1962(818), 1971(0), 1977(2310),<br>2010(1729), 2058(0)       |
| <b>8T-5</b><br>( $C_s$ )    | 2048(689), 2074(1250), 2099(475),<br>2104(1771), 2111(2608), 2127(3),<br>2137(1037), 2209(101)    | 1925(747), 1934(1117), 1980(539),<br>1988(1520), 1992(1951), 2006(849),<br>2009(1), 2083(137)     |
| <b>8T-6</b><br>( $D_{2h}$ ) | 2070(0), 2074(0), 2075(2369),<br>2085(853), 2103(0), 2116(2999),<br>2150(2081), 2202(0)           | 1950(0), 1953(0), 1957(1963),<br>1962(649), 1979(0), 1988(2451),<br>2025(1687), 2069(0)           |
| <b>8S-7</b><br>( $C_{2h}$ ) | 2062(0), 2066(0), 2068(2196),<br>2080(982), 2099(0), 2110(2994),<br>2145(1602), 2197(0)           | 1945(0), 1950(0), 1955(1773),<br>1961(829), 1977(0), 1984(2443),<br>2022(1410), 2067(0)           |



**Table S11.** The total energies (E, in Hartree) and relative energies ( $\Delta E$  in kcal/mol) of  $\text{Re}_2(\text{CO})_7$ . The number of imaginary vibrational frequencies (Nimag) and the Re-Re bond distance for each structure are also listed.

|                  | 7S-1 ( $C_s$ ) | 7S-2 ( $C_s$ ) | 7S-3 ( $C_s$ ) | 7S-4 ( $C_s$ ) | 7S-5 ( $C_2$ ) | 7S-6 ( $C_{2v}$ ) | 7S-7 ( $C_s$ ) |
|------------------|----------------|----------------|----------------|----------------|----------------|-------------------|----------------|
| MPW1PW91/SDD     |                |                |                |                |                |                   |                |
| E                | -950.11350     | -950.09884     | -950.09421     | -950.09120     | -950.06263     | -950.05973        | -950.05942     |
| $\Delta E$       | 0              | 9.2            | 12.1           | 14             | 31.9           | 33.7              | 33.9           |
| Nimag            | 1(8i)          | 0              | 1(4i)          | 0              | 1(27i)         | 2(235i,55i)       | 0              |
| Re-Re            | 2.569          | 2.702          | 2.940          | 2.924          | 2.694          | 2.517             | 2.816          |
| MPW1PW91/LANL2DZ |                |                |                |                |                |                   |                |
| E                | -951.67520     | -951.66020     | -951.65500     | -951.65194     | -951.62227     | -951.61979        | -951.61769     |
| $\Delta E$       | 0              | 9.4            | 12.7           | 14.6           | 33.2           | 34.8              | 36.1           |
| Nimag            | 1(6i)          | 0              | 1(4i)          | 0              | 1(26i)         | 2(239i,80i)       | 0              |
| Re-Re            | 2.545          | 2.675          | 2.911          | 2.901          | 2.681          | 2.499             | 2.801          |
| BP86/SDD         |                |                |                |                |                |                   |                |
| E                | -950.57557     | -950.55869     | -950.55686     | -950.55239     |                |                   |                |
| $\Delta E$       | 0              | 10.6           | 11.7           | 14.5           |                |                   |                |
| Nimag            | 0              | 0              | 0              | 0              |                |                   |                |
| Re-Re            | 2.581          | 2.694          | 2.966          | 2.934          |                |                   |                |

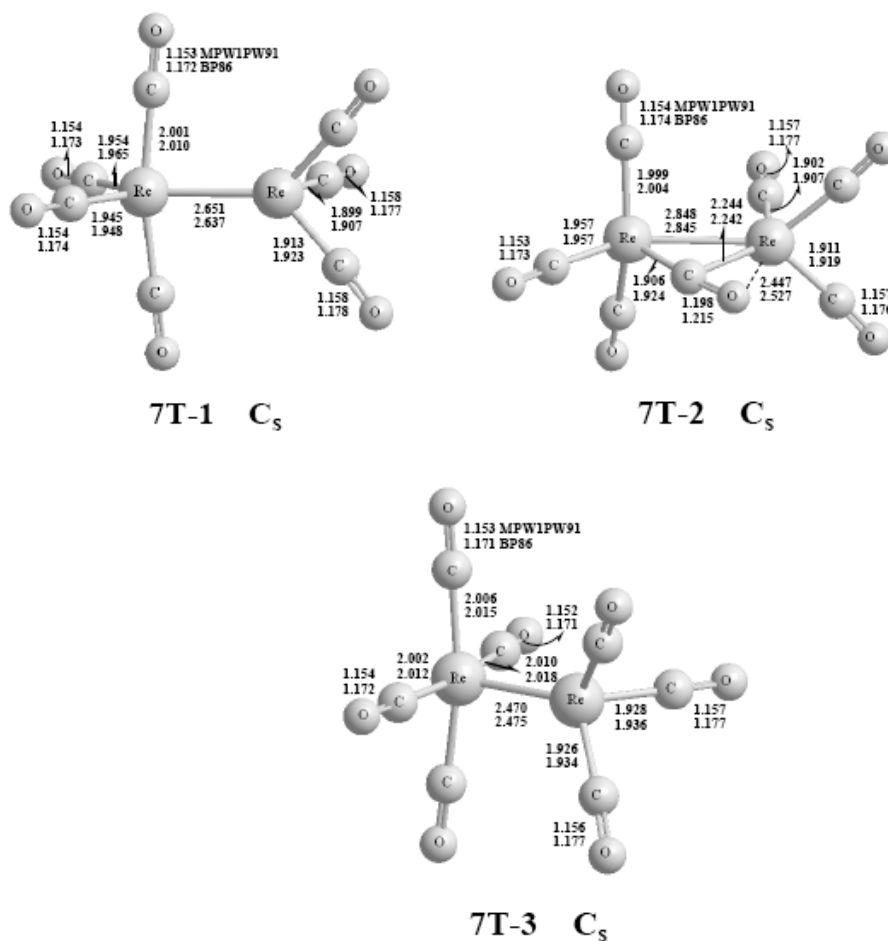

**Figure S7.** Three optimized triplet structures of  $\text{Re}_2(\text{CO})_7$  by SDD basis sets.

**Table S12.** The total energies ( $E$ , in Hartree) and relative energies ( $\Delta E$ , in kcal/mol) of triplet structures of  $\text{Re}_2(\text{CO})_7$ . The number of imaginary vibrational frequencies (Nimag) and the Re-Re bond distance for each structure are also listed.

|                  |            | 7T-1 ( $C_s$ ) | 7T-2 ( $C_s$ ) | 7T-3 ( $C_s$ ) |
|------------------|------------|----------------|----------------|----------------|
| MPW1PW91/<br>SDD | $E$        | -950.07890     | -950.07540     | -950.07068     |
|                  | $\Delta E$ | 21.7           | 23.9           | 26.9           |
|                  | Nimag      | 0              | 0              | 1(4i)          |
|                  | Re-Re      | 2.637          | 2.848          | 2.470          |
| BP86/SDD         | $E$        | -950.54255     | -950.53734     | -950.53631     |
|                  | $\Delta E$ | 20.7           | 24.0           | 24.6           |
|                  | Nimag      | 0              | 0              | 1(7i)          |
|                  | Re-Re      | 2.637          | 2.845          | 2.475          |

**Table S13.** The infrared  $\nu(\text{CO})$  vibrational frequencies ( $\text{cm}^{-1}$ ) predicted for  $\text{Re}_2(\text{CO})_7$  (infrared intensities in parentheses are in  $\text{km/mol}$ , bridging  $\nu(\text{CO})$  frequencies are in **bold**).

|                             | MPW1PW91/SDD                                                                                           | MPW1PW91/LANL2DZ                                                                                       | BP86/SDD                                                                                       |
|-----------------------------|--------------------------------------------------------------------------------------------------------|--------------------------------------------------------------------------------------------------------|------------------------------------------------------------------------------------------------|
| <b>7S-1</b><br>( $C_s$ )    | 2045(577), 2045(567),<br>2095(2369), 2096(2411),<br>2126(997), 2128(32),<br>2193(70)                   | 2050(545), 2050(536),<br>2098(2369), 2099(2412),<br>2130(47), 2131(981),<br>2196(67)                   | 1930(523), 1931(494),<br>1978(1874), 1978(1929),<br>2003(783), 2005(70),<br>2066(116)          |
| <b>7S-2</b><br>( $C_s$ )    | 2050(7), 2052(397),<br>2063(1577), 2074(2727),<br>2095(473), 2126(2182),<br>2165(41)                   | 2055(13), 2058(421),<br>2070(1536), 2078(2682),<br>2099(496), 2130(2147),<br>2170(31)                  | 1930(22), 1939(397),<br>1952(2182), 1952(1145),<br>1969(589), 2001(1765),<br>2035(23)          |
| <b>7S-3</b><br>( $C_s$ )    | <b>1830(514)</b> , 2058(1157),<br>2061(550), 2078(1314),<br>2099(2288), 2133(1300),<br>2173(85)        | <b>1841(502)</b> , 2064(1152),<br>2066(502), 2082(1303),<br>2102(2297), 2137(1292),<br>2177(74)        | <b>1727(442)</b> , 1943(918),<br>1944(328), 1955(980),<br>1970(2006), 2008(1172),<br>2042(88)  |
| <b>7-4</b><br>( $C_s$ )     | <b>1833(533)</b> , 2039(822),<br>2073(980), 2092(2279),<br>2106(1986), 2116(492),<br>2188(341)         | <b>1843(533)</b> , 2043(801),<br>2079(971), 2096(2257),<br>2109(1979), 2120(486),<br>2191(337)         | <b>1735(423)</b> , 1920(663),<br>1959(821), 1971(1889),<br>1984(1659), 1991(384),<br>2060(315) |
| <b>7S-5</b><br>( $C_2$ )    | <b>1885(508)</b> , 2043(1009),<br>2045(1314), 2078(84),<br>2080(2531), 2131(2917),<br>2177(20)         | <b>1890(504)</b> , 2048(1008),<br>2050(1301), 2082(97),<br>2084(2500), 2134(2864),<br>2180(20)         |                                                                                                |
| <b>7S-6</b><br>( $C_{2v}$ ) | <b>2049(686)</b> , 2068(3039),<br>2074(0), 2080(131),<br>2087(1943), 2120(3173),<br>2173(0)            | <b>2054(728)</b> , 2073(2994),<br>2080(0), 2085(115),<br>2091(1889), 2124(3147),<br>2177(0)            |                                                                                                |
| <b>7S-7</b><br>( $C_s$ )    | <b>1761(589)</b> , <b>1801(477)</b> ,<br>2045(843), 2099(2135),<br>2114(796), 2132(1530),<br>2197(280) | <b>1750(591)</b> , <b>1788(471)</b> ,<br>2039(849), 2094(2215),<br>2108(800), 2129(1527),<br>2193(296) |                                                                                                |
| <b>7T-1</b><br>( $C_s$ )    | 2053(329), 2062(707),<br>2082(1644), 2086(2470),<br>2091(619), 2124(2044),<br>2170(75)                 |                                                                                                        | 1930(247), 1942(447),<br>1957(1505), 1961(2007),<br>1966(404), 1996(1681),<br>2036(72)         |
| <b>7T-2</b><br>( $C_s$ )    | <b>1828(437)</b> , 2064(19),<br>2075(807), 2078(2858),<br>2088(742), 2127(1910),<br>2163(134)          |                                                                                                        | <b>1731(326)</b> , 1939(337),<br>1954(410), 1955(1995),<br>1963(787), 1998(1706),<br>2032(140) |
| <b>7T-3</b><br>( $C_s$ )    | 2056(232), 2056(185),<br>2087(1953), 2088(2718),<br>2090(720), 2129(1339),<br>2179(49)                 |                                                                                                        | 1931(299), 1931(271),<br>1966(2082), 1967(2131),<br>1974(21), 2002(916),<br>2052(146)          |

**Complete Gaussian 03 reference (Reference 30)**

Frisch, M. J.; Trucks, G. W.; Schlegel, H. B.; Scuseria, G. E.; Robb, M. A.; Cheeseman, J. R.; Montgomery, Jr., J. A.; Vreven, T.; Kudin, K. N.; Burant, J. C.; Millam, J. M.; Iyengar, S. S.; Tomasi, J.; Barone, V.; Mennucci, B.; Cossi, M.; Scalmani, G.; Rega, N.; Petersson, G. A.; Nakatsuji, H.; Hada, M.; Ehara, M.; Toyota, K.; Fukuda, R.; Hasegawa, J.; Ishida, M.; Nakajima, T.; Honda, Y.; Kitao, O.; Nakai, H.; Klene, M.; Li, X.; Knox, J. E.; Hratchian, H. P.; Cross, J. B.; Bakken, V.; Adamo, C.; Jaramillo, J.; Gomperts, R.; Stratmann, R. E.; Yazyev, O.; Austin, A. J.; Cammi, R.; Pomelli, C.; Ochterski, J. W.; Ayala, P. Y.; Morokuma, K.; Voth, G. A.; Salvador, P.; Dannenberg, J. J.; Zakrzewski, V. G.; Dapprich, S.; Daniels, A. D.; Strain, M. C.; Farkas, O.; Malick, D. K.; Rabuck, A. D.; Raghavachari, K.; Foresman, J. B.; Ortiz, J. V.; Cui, Q.; Baboul, A. G.; Clifford, S.; Cioslowski, J.; Stefanov, B. B.; Liu, G.; Liashenko, A.; Piskorz, P.; Komaromi, I.; Martin, R. L.; Fox, D. J.; Keith, T.; Al-Laham, M. A.; Peng, C. Y.; Nanayakkara, A.; Challacombe, M.; Gill, P. M. W.; Johnson, B.; Chen, W.; Wong, M. W.; Gonzalez, C.; and Pople, J. A. Gaussian 03, Revision C.02; Gaussian, Inc., Wallingford CT, **2004**.
